# Supplementary material
Source: Springer Nature journal article supplement (https://www.springermedizin.de/resource/supplementary/12890_2014_601_MOESM2_ESM.pdf/9505420)

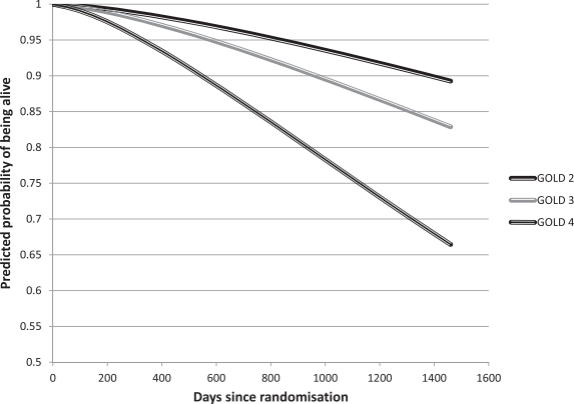

Supplement: MOESM2 [file 9505420]
